# Supplementary material
Source: Springer Nature journal article supplement (https://www.springermedizin.de/resource/supplementary/13049_2011_308_MOESM1_ESM.pdf/9666306)
Supplement: MOESM1 [file 9666306]

8 interviews  
with  
informants  
from HROs

Key  
informant  
interviews

84 assertions  
regarding checklist  
development and  
implementation

**Round 1**  
Categorisation of  
assertions into groups  
and subgroups

**Round 2**  
Prioritisation  
of assertions

Delphi  
approach

**Consensus  
meeting**
